# Supplementary material
Source: HighWire-hosted journal article supplement (https://lupus.bmj.com/content/10/2/e001010)
Supplement: inline-supplementary-material-1 [file inline-supplementary-material-1.pdf]

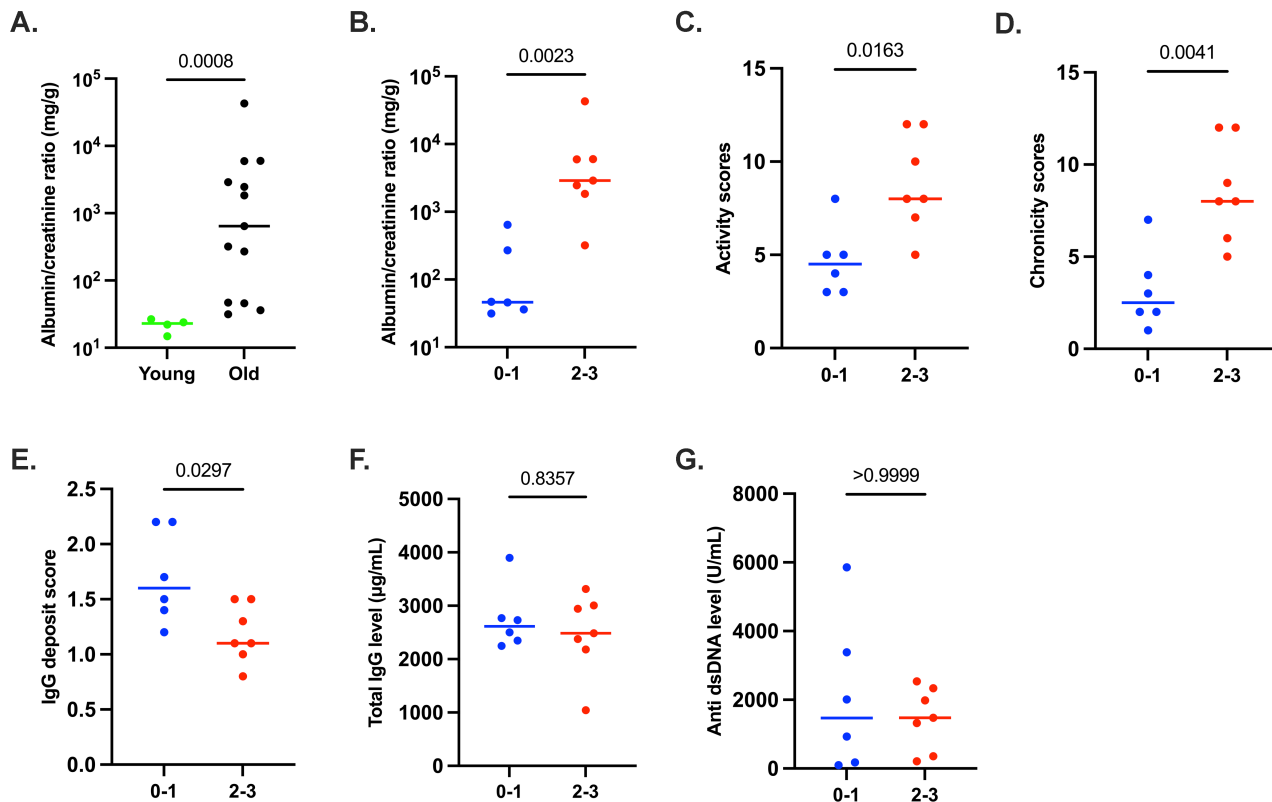

**Supplementary Figure S1: Renal disease heterogeneity in aged B6.Sle1.2.3 mice.** **A.** Urine albumin/creatinine ratio (mg/g) in four 3 month old (Young) vs. thirteen 9-11 month old B6.Sle1.2.3 mice (Old). **B.** Urine albumin/creatinine ratio (mg/g) in 9-11 month old B6.Sle1.2.3 mice, selected based on proteinuria measured by dipstick: six mice with no to low proteinuria (value 0-1) and seven mice with high proteinuria (value  $\geq 2$ ). **C-G.** Histopathological evaluation (activity and chronicity) of renal injury (median scores from three blinded scorers, total scale: 0-12), semi-quantitative evaluation of glomerular IgG deposits in frozen OCT kidney sections (mean of scores from three blinded scorers, 30 glomeruli per mouse), total IgG ( $\mu\text{g/mL}$ ) and anti-double stranded DNA (dsDNA) antibody (U/mL) in plasma, in 9-11 month old B6.Sle1.2.3 mice, selected based on proteinuria measured by dipstick: six mice with no to low proteinuria (value 0-1) and seven mice with high proteinuria (value  $\geq 2$ ). Horizontal bars: medians.  $p$ -values: Mann-Whitney test.
